# Supplementary material for: Clinical significance of long non-coding RNA DUXAP8 and its protein coding genes in hepatocellular carcinoma
Source: PubMed Central journal article supplement (PMC7477403; doi:10.7150/jca.47902), 2020-08-25

## Supplementary figure legends

Supplementary figure 1. Validation of diagnostic and prognostic significance of DUXAP8-related protein-coding genes. A-C: Differential expressions of *MAGEA1*, *MKRN3*, and *DGKI*; D-F: Diagnostic receiver operating characteristic curves of *MAGEA1*, *MKRN3*, and *DGKI*; G-H: Survival plots of RNF2 in HCC in HCCDB15 and HCCDB18 datasets.

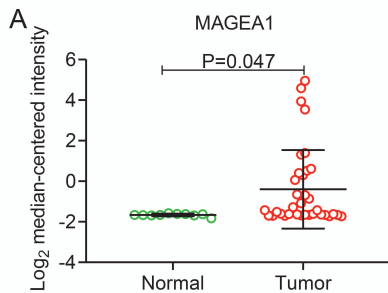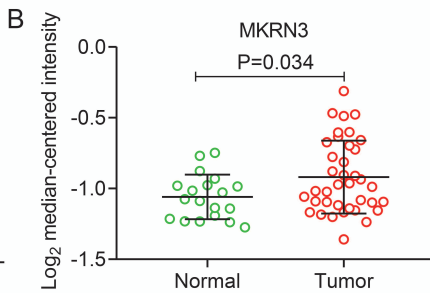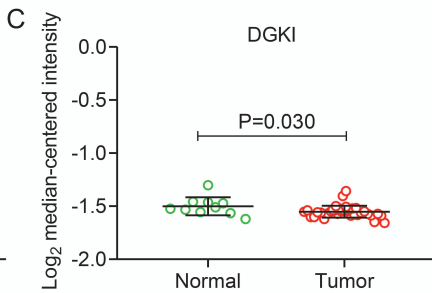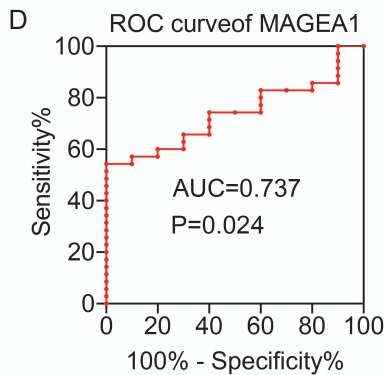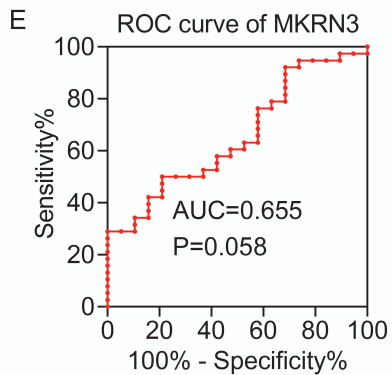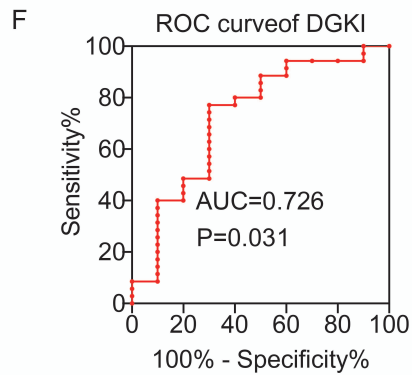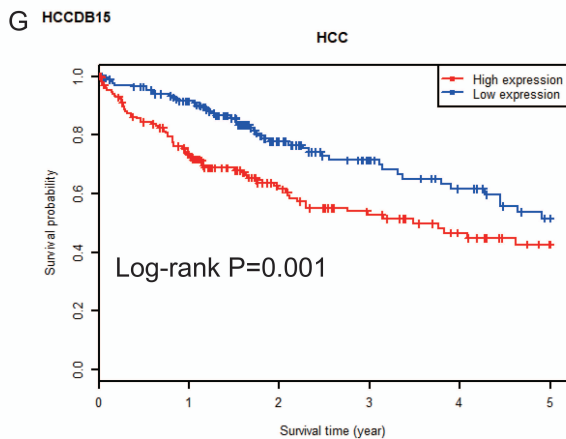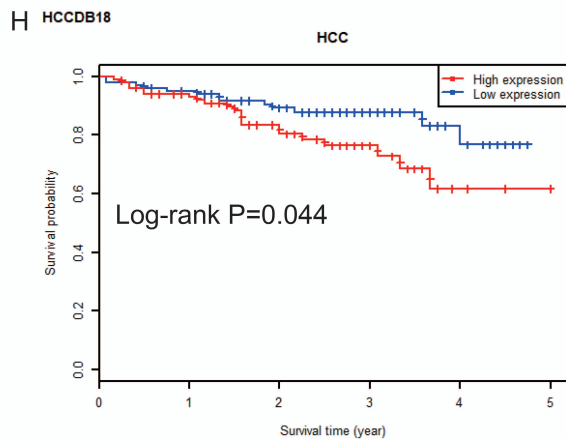

Supplement: jcav11p6140s1.pdf [file jcav11p6140s1.pdf]
